# Supplementary material for: A3-Coupling catalyzed by robust Au nanoparticles covalently bonded to HS-functionalized cellulose nanocrystalline films
Source: PubMed Central journal article supplement (PMC3740685; doi:10.3762/bjoc.9.155), 2013-07-10
Supplement: Beilstein_J_Org_Chem-09-1388-s001.pdf [file Beilstein_J_Org_Chem-09-1388-s001.pdf]

**Supporting Information**

**for**

**A<sup>3</sup>-Coupling catalyzed by robust Au nanoparticles**

**covalently bonded to HS-functionalized cellulose**

**nanocrystalline films**

Jian-Lin Huang, Derek G. Gray\* and Chao-Jun Li\*

Department of Chemistry, McGill University, 801 Sherbrooke Street West, Montreal, Quebec  
H3A0B8, Canada

Email: Chao-Jun Li - cj.li@mcgill.ca; Derek G. Gray - derek.gray@mcgill.ca

\*Corresponding author

**Experimental procedures, HRTEM images and analysis procedure**

**Experimental methods**

Materials:

Cotton from Whatman cellulose filter aid was used as the cellulose source. Deionized water (18.2 M $\Omega$  cm, Millipore Milli-Q Purification System) was used throughout. 3-Mercaptopropyltrimethoxysilane (MPTMS), HAuCl<sub>4</sub>, solvents and other reagents were purchased from Sigma-Aldrich chemical company and were used without prior purification.

**Preparation of CNCs**

Suspensions of cellulose nanocrystals (CNCs) were prepared as previously described<sup>1</sup> by hydrolysis using 64% w/w sulfuric acid at 45 °C for 45 minutes under constant stirring. Typically, 20 g of cotton filter-aid was treated with 350 mL of acid. Immediately following the acid hydrolysis, the suspension was diluted 10-fold with deionized water to quench the reaction. The suspension was centrifuged at 10000 rpm for 6 minutes to concentrate the cellulose and to remove excess water and acid. The resultant precipitate was rinsed, re-centrifuged and dialyzed against water for 6 days until constant neutral pH was achieved in the effluent. Solid CNCs was also obtained by freeze-drying overnight or by air-drying.

**Preparation of Au@HS-CNCs using a modified procedure reported by Tingaut et al<sup>2</sup>.**

In a standard experiment, a suspension consisting of 330 mg CNCs well-dispersed in an EtOH/H<sub>2</sub>O (95/5, w/w) mixture (26.4 g) was stirred for 6 h at 25 °C. 3.96 g of 3-mercaptopropyltrimethoxysilane (MPTMS) was hydrolyzed in an EtOH/H<sub>2</sub>O (95/5, w/w) mixture (35.6 g), reaching a final concentration of 10% (w/w). The pH was adjusted to 3.5 with AcOH and the solution was stirred at room temperature for 2 h. Then, the well-dispersed CNC suspension was added to this solution, and the mixture was diluted with EtOH/H<sub>2</sub>O (95/5, w/w) to a final CNC concentration of 0.5% (w/w) with respect to the solvent. This suspension was stirred at room temperature for 4 h and filtered. Then, the wet HS-CNC cake was dried at 120 °C for 2 h, and was successively Soxhlet extracted with EtOH/H<sub>2</sub>O (95/5, w/w) and dichloromethane for 4 h. The thiol-functionalized films were finally dried at 40 °C overnight. Finally, the HS-CNC films were added into HAuCl<sub>4</sub> ethanol solution and kept under stirring at room temperature for 24 h, and then filtered and dried at 40 °C overnight.

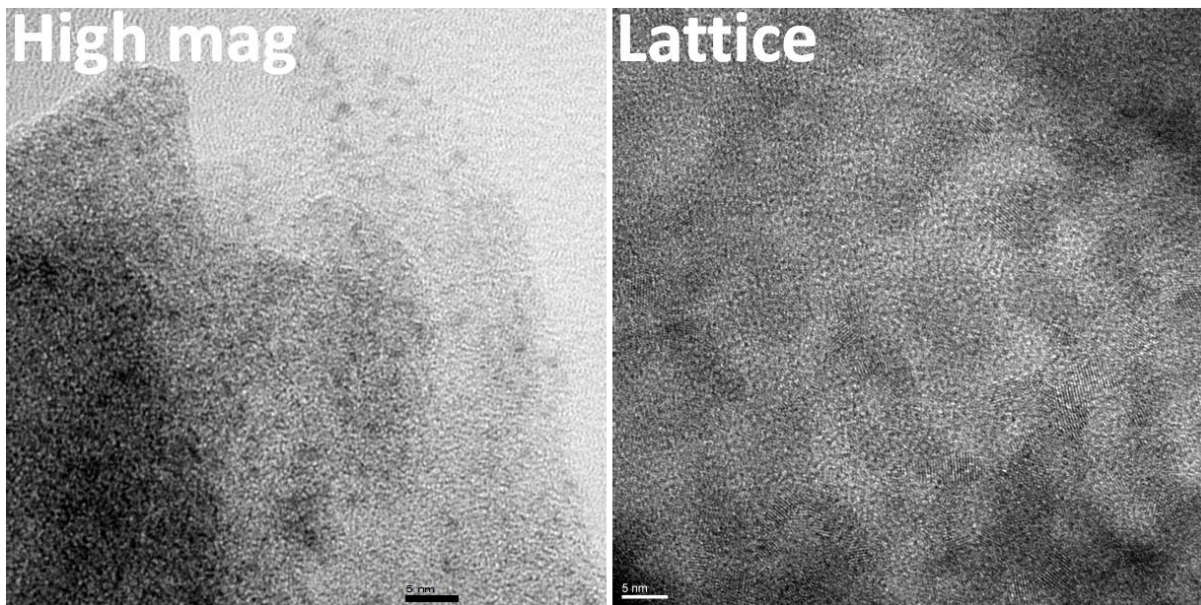

**Figure S1:** High-resolution TEM images of the Au@HS-CNC (4.4 mol %) catalyst.

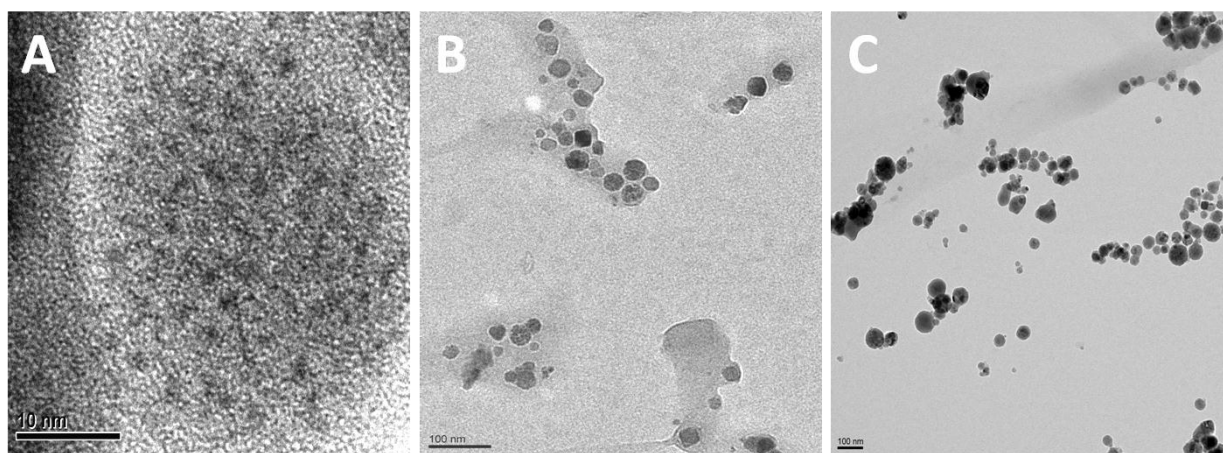

**Figure S2:** The TEM images of the (A) Au@HS-CNC (2.9 mol %), (B) Au@HS-CNC (5.2 mol %) and (c) Au@HS-CNC (6.3 mol %) catalyst.

**The analysis procedure of the product:**

After completion of the reaction, the mixture was diluted with 0.5 mL deuterated chloroform ( $\text{CDCl}_3$ ), filtered and eluted through a short silica gel plug with more deuterated chloroform (2 x 0.5 mL), and dried over  $\text{MgSO}_4$ , then filtered and analyzed by  $^1\text{H}$  NMR.  $^1\text{H}$  NMR spectra were recorded on a Varian 400 MHz spectrometer and the chemical shifts were reported in parts per million ( $\delta$ ) relative to internal standard TMS (0 ppm) and all NMR spectra were recorded at room temperature.

**References**

1. (a) M. Hasani, E. D. Cranston, G. Westmana, D. G. Gray, *Soft Matter*, 2008, **4**, 2238-2244;  
(b) E. Kloser, D. G. Gray, *Langmuir*, 2010, **26**, 13450-13456.
2. P. Tingaut, R. Hauert, T. Zimmermann, *J. Mater. Chem.*, 2011, **21**, 16066-16076.
